# Supplementary material
Source: PubMed Central journal article supplement (PMC4522363)

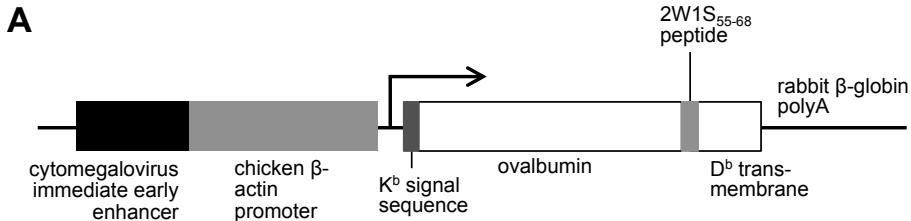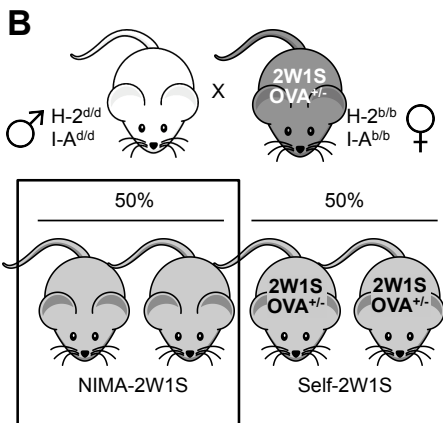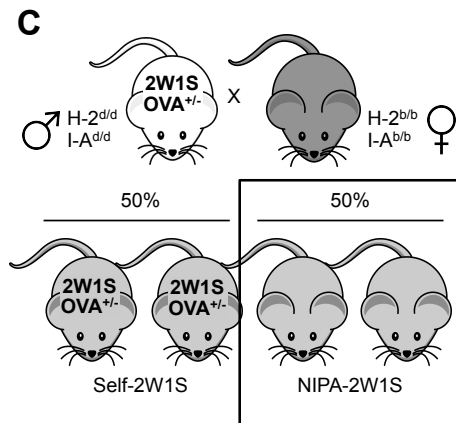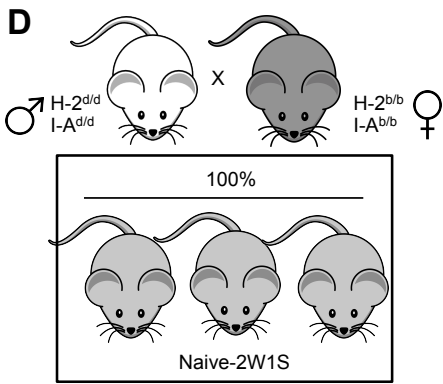

Supplement: NIHMS707202-supplement-1.pdf [file NIHMS707202-supplement-1.pdf]

**A**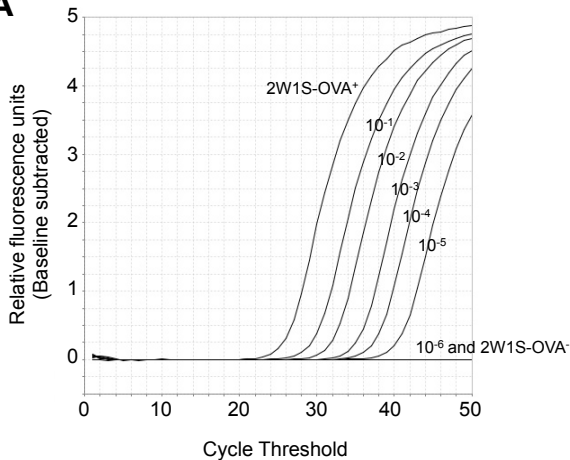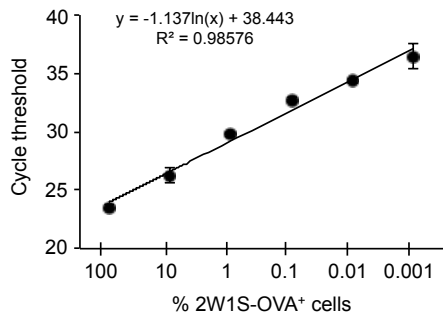**B**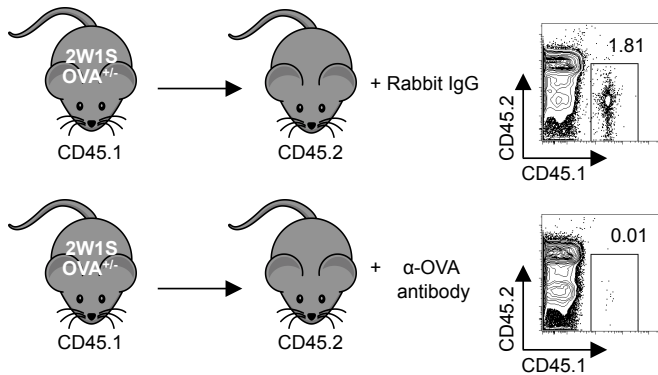

Supplement: NIHMS707202-supplement-2.pdf [file NIHMS707202-supplement-2.pdf]

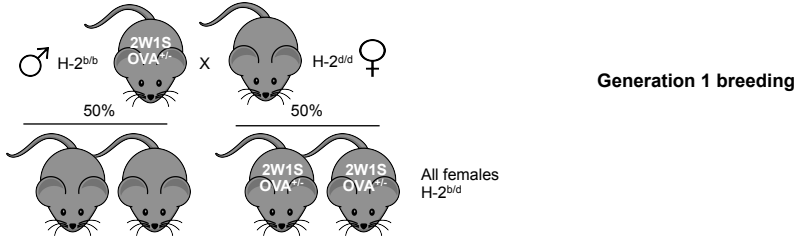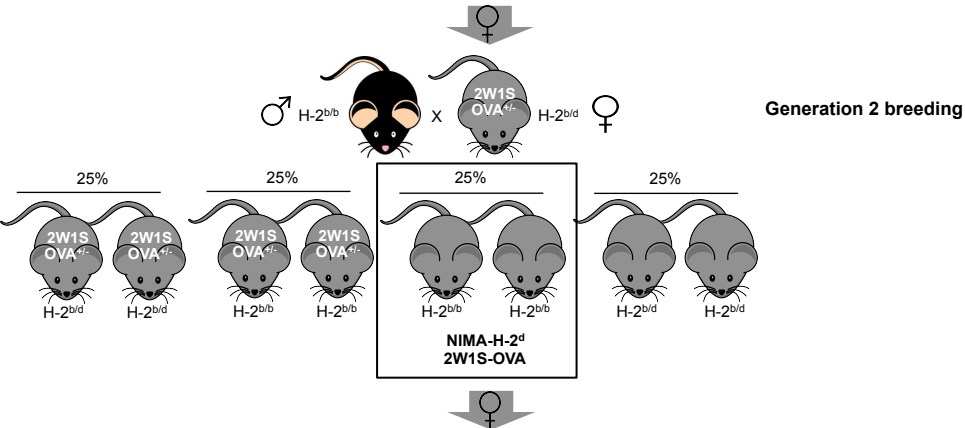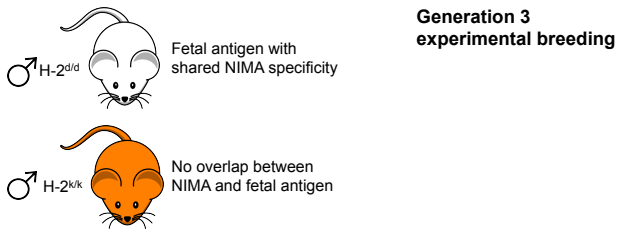

Supplement: NIHMS707202-supplement-3.pdf [file NIHMS707202-supplement-3.pdf]

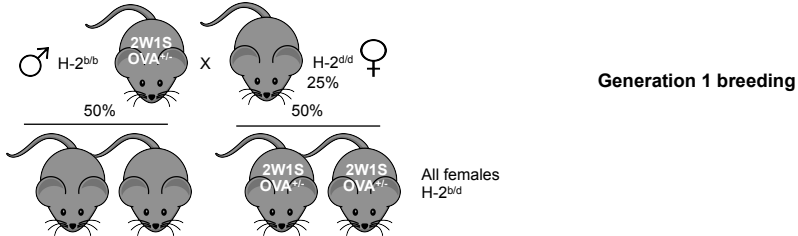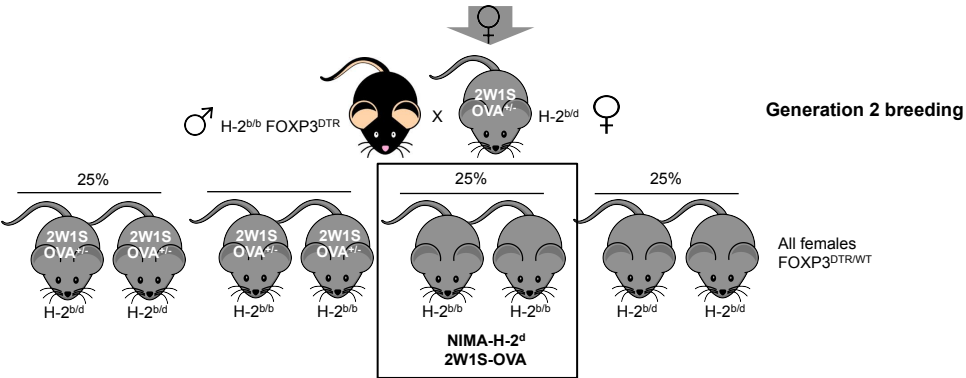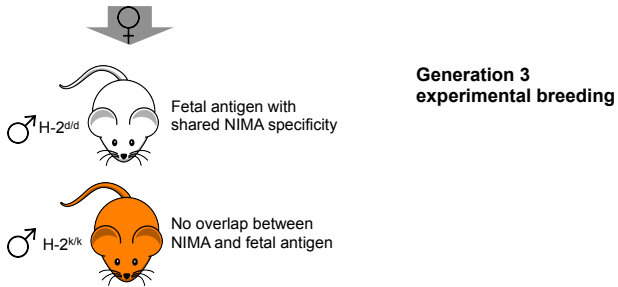

Supplement: NIHMS707202-supplement-4.pdf [file NIHMS707202-supplement-4.pdf]
